# Supplementary material for: On-demand responsive nanoplatform mediated targeting of CAFs and down-regulating mtROS-PYK2 signaling for antitumor metastasis
Source: Royal Society of Chemistry journal article supplement (doi:10.1039/d0bm01878c), 2021-01-01
Supplement: d0bm01878c1.pdf [file d0bm01878c1.pdf]

**Electronic Supplementary Information**

**On-Demand Responsive Nanoplatfom Mediated Targeting CAFs**

**and Down-Regulating mtROS-PYK2 Signaling**

**for Antitumor Metastasis**

Tiantian Zuo<sup>a</sup>, Jun Zhang<sup>a</sup>, Jie Yang<sup>a</sup>, Rui Xu<sup>a</sup>, Zongwei Hu<sup>a</sup>, Zhihua Wang<sup>a</sup>, Huizi

Deng<sup>a</sup> and Qi Shen<sup>a,\*</sup>

<sup>a</sup>School of Pharmacy, Shanghai Jiao Tong University, 800 Dongchuan Road,  
Shanghai 200240, China

\*Corresponding Author: Qi Shen, E-mail addresses: qshen@sjtu.edu.cn. Fax: +86-21-  
34204049. Tell: +86-34204049.

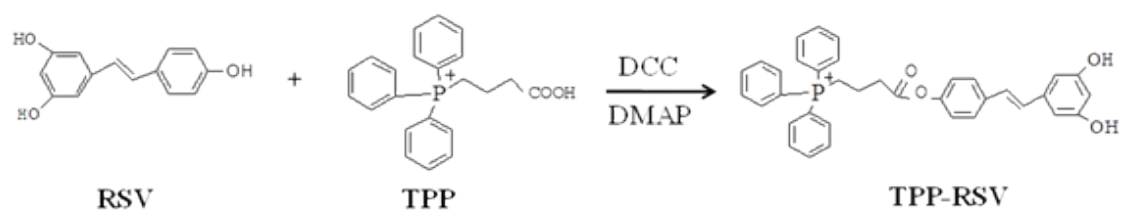

Figure S1 The equation of TPP-RSV synthesis

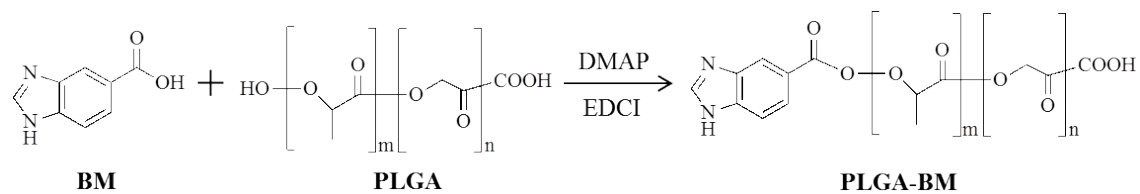

Figure S2 The equation of PLGA-BM synthesis

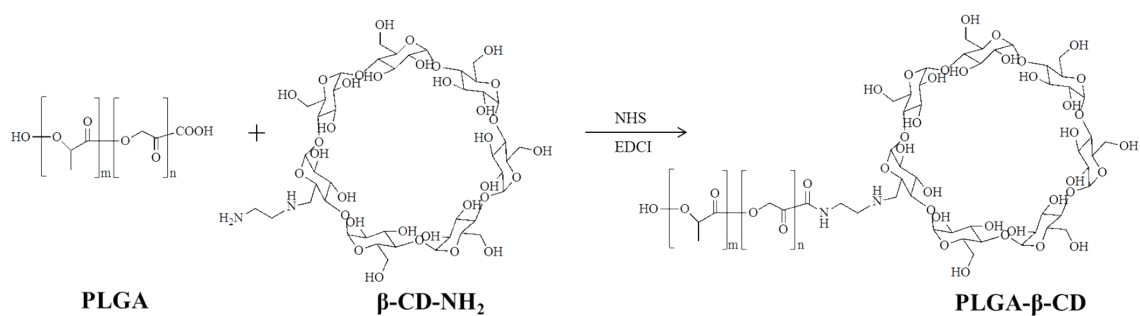

Figure S3 The equation of PLGA-β-CD synthesis

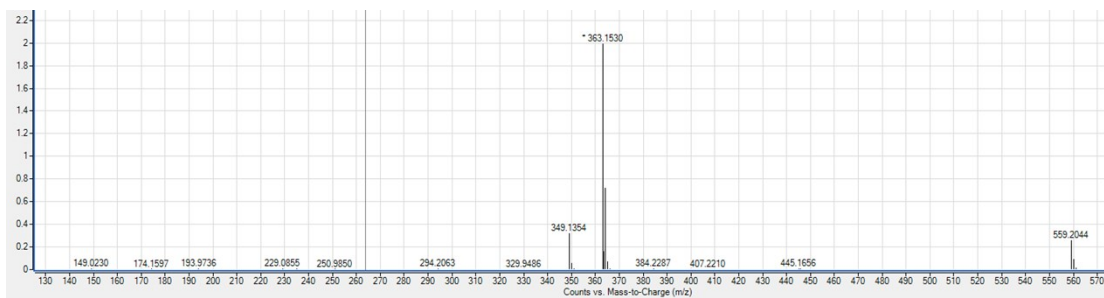

Figure S4 ESI-MS spectrum of TPP-RSV prodrug

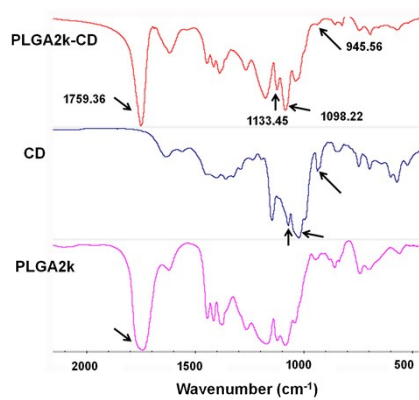

Figure S5 FTIR spectrum of PLGA<sub>2k</sub>-CD polymer.

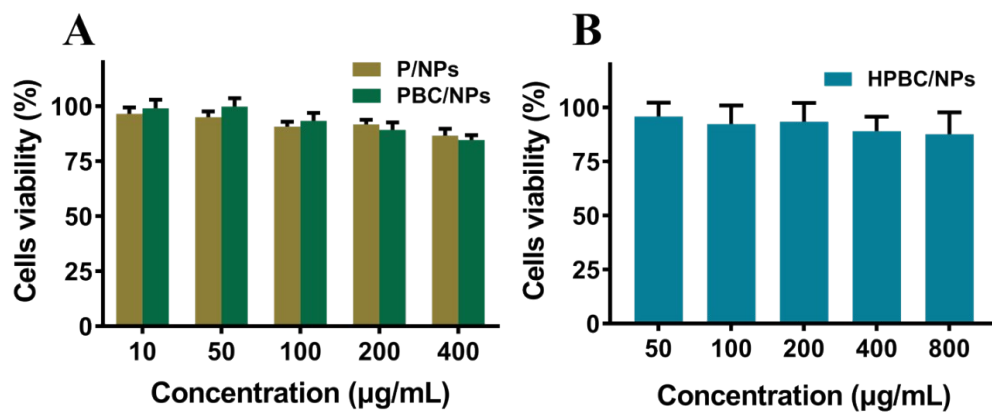

Figure S6 Cytotoxicity of blank P/NPs, blank PBC/NPs and blank HPBC/NPs were estimated by MTT method at various concentrations.

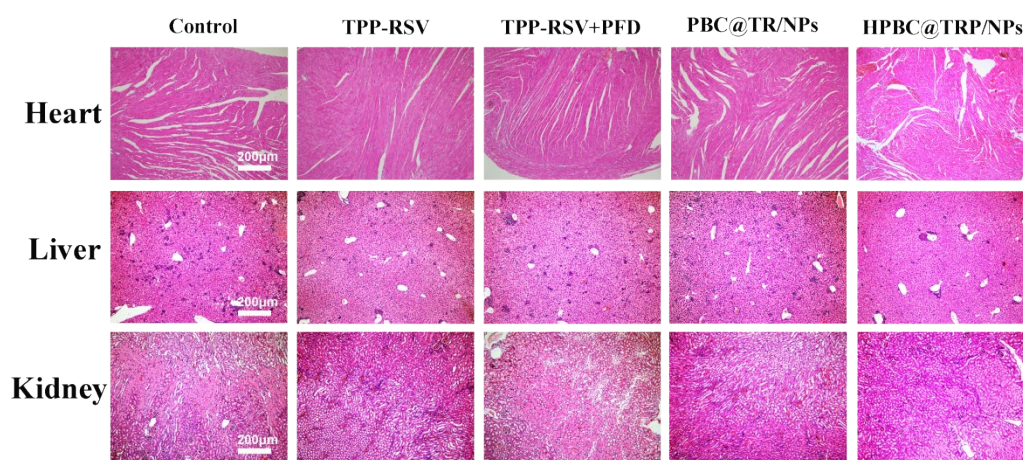

Figure S7 H&E staining images of heart, liver and kidneys of 4T1/NIH3T3 tumor bearing mice. Scale bar: 200 µm.

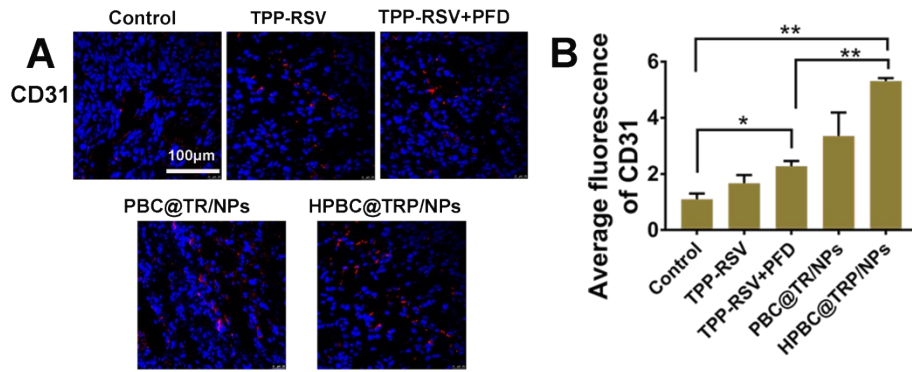

Figure S8 The vascular normalization in tumors. (A) CLSM images of immunofluorescence staining of tumor vessels (anti-CD31 staining) at the end point of treatments. (B) Quantitative analysis of tumor vessels (CD31<sup>+</sup>) in tumor tissue by Image J software. \*P < 0.05, \*\* P < 0.01.

Table S1 The characterization of P@TR/NPs, PBC@TR/NPs and HPBC@TRP/NPs formulations, including particle size and Zeta potential.

Data are given as mean  $\pm$  SD (n = 3).

|           | P@TR/NPs          | PBC@TR/NPs        | HPBC@TRP/NPs      |
|-----------|-------------------|-------------------|-------------------|
| Size (nm) | 146.2 $\pm$ 8.4   | 150.7 $\pm$ 2.3   | 162.4 $\pm$ 3.9   |
| PDI       | 0.111 $\pm$ 0.037 | 0.109 $\pm$ 0.018 | 0.124 $\pm$ 0.001 |
| Zeta (mV) | 52.8 $\pm$ 5.2    | 49.2 $\pm$ 2.1    | -35.7 $\pm$ 0.4   |

Table S2 The EE% and DL% analysis of prodrug TPP-RSV and PFD in various formulations. Data are given as mean  $\pm$  SD (n = 3).

|         | P@TR/NPs | PBC@TR/NPs       | HPBC@TRP/NPs     |                  |
|---------|----------|------------------|------------------|------------------|
| TPP-RSV | EE%      | 75.92 $\pm$ 1.32 | 73.92 $\pm$ 3.96 | 86.42 $\pm$ 2.53 |
|         | DL%      | 5.32 $\pm$ 0.09  | 5.18 $\pm$ 0.28  | 4.16 $\pm$ 0.12  |
| PFD     | EE%      | —                | —                | 63.72 $\pm$ 1.03 |
|         | DL%      | —                | —                | 6.14 $\pm$ 0.10  |

Table S3 The evaluation of IC<sub>50</sub> for 4T1 cells after RSV, TPP-RSV, P@TR/NPs,

PBC@TR/NPs and HPBC@TRP/NPs treatments.

Data are given as mean  $\pm$  SD (n = 3).

| Mean $\pm$ SD              | RSV               | TPP-RSV          | P@TR/NPs         | PBC@TR/NPs      | HPBC@TR/NPs      |
|----------------------------|-------------------|------------------|------------------|-----------------|------------------|
| IC <sub>50</sub> (nmol/mL) | 108.40 $\pm$ 6.65 | 31.73 $\pm$ 1.23 | 60.62 $\pm$ 1.73 | 45.83 $\pm$ 1.3 | 38.49 $\pm$ 1.10 |
